# Supplementary material
Source: publisher site journal article supplement (https://www.dovepress.com/article/392669)
Supplement: Supplementary file 1 [file get_supplementary_file.php]

**Supplementary Table 1** IOL power calculation capabilities of the SPS

| **IOL Power Calculation Capabilities of the SPS** |
| --- |
| Astigmatism Fix |
| Barrett |
| Barrett Toric |
| Barrett Total K |
| Barrett True AL |
| Barrett True K |
| Haigis |
| Hoffer Q |
| Holladay 1 |
| Holladay 2 |
| SRK/T |

**Abbreviations**: IOL: intraocular lens; SPS: surgical planning software.
